# Supplementary material for: Energetic and electron density analysis of hydrogen dissociation of protonated benzene
Source: Royal Society of Chemistry journal article supplement (doi:10.1039/b906961e), 2009-01-01
Supplement: b906961e.pdf [file b906961e.pdf]

Electronic supplementary information for:  
Energetic and electron density analysis of hydrogen  
dissociation of protonated benzene

Marco A. García-Revilla and Jesús Hernández-Trujillo

May 25, 2009

## 1 Nuclear Coordinates, molecular energies and summary of imaginary vibrational frequencies

Nuclear coordinates of the benzenium cation, transition state of 1-2 proton migration, two-fold saddle point, and dissociation products constrained to  $C_s$  symmetry:  $[C_6H_6]^+ + H$  and  $[C_6H_5]^+ + H_2$ . Geometry optimizations performed at the MCSCF(6,6)/6-311++G(d,p) level with the GAMESS quantum chemistry program. The geometry optimization criterion was OPTTOL=1.0D-6 except for the partial optimizations during the dissociations which were carried out with OPTTOL=1.0D-5.

In the case of  $[C_6H_6]^+ + H$  as dissociation products, one significant and one small imaginary frequencies was obtained for a C1-Ha distance of ca. 10 Å. From this geometry, the system

was further optimized without any symmetry constraint and with explicit Hessian calculation (option HESS=CALC) to yield a true minimum. In the case of  $[\text{C}_6\text{H}_5]^+ + \text{H}_2$  at the same C1-Ha separation, unconstrained geometry optimization plus Hessian calculation does not change the molecular geometry.

Table 1: Benzenium cation

| atom | x             | y             | z             |
|------|---------------|---------------|---------------|
| C    | -1.2389977479 | 2.1229687044  | -0.0000689141 |
| C    | 1.2390093242  | 2.1229508467  | -0.0000652984 |
| C    | -1.2500708245 | 0.7570756452  | 0.0000418852  |
| C    | 1.2500630450  | 0.7570575339  | 0.0000459073  |
| C    | -0.0000096722 | -0.0217378769 | 0.0001060692  |
| C    | 0.0000106932  | 2.7942725928  | -0.0001215181 |
| H    | -2.1508552001 | 2.6893243222  | -0.0001156048 |
| H    | 2.1508743772  | 2.6892943899  | -0.0001091593 |
| H    | -0.0000124408 | -0.7068271379 | -0.8551297819 |
| H    | -2.1803778243 | 0.2174444422  | 0.0000846788  |
| H    | 2.1803632687  | 0.2174147462  | 0.0000914883  |
| H    | -0.0000148689 | -0.7066933412 | 0.8554484680  |
| H    | 0.0000178714  | 3.8711751325  | -0.0002082200 |

Table 2: Transition state of 1-2 proton migration

| atom | x             | y             | z             |
|------|---------------|---------------|---------------|
| C    | -0.7142053861 | 0.0522454765  | 0.0060582971  |
| C    | 0.7142060824  | 0.0522454641  | 0.0060576687  |
| C    | -1.4203392479 | 1.2917835318  | 0.0031250984  |
| C    | 1.4203396651  | 1.2917831874  | 0.0031255695  |
| C    | -0.7117080536 | 2.4665207328  | -0.0025378041 |
| C    | 0.7117083844  | 2.4665205047  | -0.0025372610 |
| H    | -0.0000025435 | -0.0124757368 | 1.0920708089  |
| H    | -1.2340685472 | -0.8881089796 | -0.0384772122 |
| H    | 1.2340687018  | -0.8881094543 | -0.0384768275 |
| H    | -2.4932226625 | 1.2793569655  | -0.0068154219 |
| H    | 2.4932230818  | 1.2793568421  | -0.0068135034 |
| H    | -1.2351616072 | 3.4044408875  | -0.0073903098 |
| H    | 1.2351621325  | 3.4044405783  | -0.0073891026 |

Table 3: Two-fold saddle point

| atom | x             | y             | z             |
|------|---------------|---------------|---------------|
| C    | -1.4012471289 | 0.0000006104  | -0.0960944193 |
| C    | 1.4012471296  | 0.0000006119  | -0.0960944251 |
| C    | -0.7006361957 | -1.2135503875 | -0.0958910763 |
| C    | 0.7006362031  | -1.2135503725 | -0.0958910781 |
| C    | -0.7006361435 | 1.2135515195  | -0.0958903315 |
| C    | 0.7006361697  | 1.2135515139  | -0.0958903420 |
| H    | -2.4675362071 | 0.0000000855  | -0.2235092789 |
| H    | 2.4675362126  | 0.0000000823  | -0.2235092509 |
| H    | -0.0000000783 | -0.0000048125 | -1.1012755562 |
| H    | -1.2338126905 | -2.1370258220 | -0.2228705398 |
| H    | 1.2338127070  | -2.1370257988 | -0.2228705323 |
| H    | -1.2338129227 | 2.1370263830  | -0.2228698898 |
| H    | 1.2338129447  | 2.1370263870  | -0.2228698788 |

Table 4:  $[\text{C}_6\text{H}_6]^+ + \text{H}$  (dissociation constrained to  $C_s$  symmetry)

| atom | x             | y             | z             |
|------|---------------|---------------|---------------|
| C    | -1.2416840142 | 1.6896263357  | -1.0621324073 |
| C    | 1.2416840142  | 1.6896263357  | -1.0621324073 |
| C    | -1.2427831136 | 0.5269009151  | -0.3422838702 |
| C    | 1.2427831136  | 0.5269009151  | -0.3422838702 |
| C    | 0.0000000000  | -0.0606761497 | 0.0214727805  |
| C    | 0.0000000000  | 2.2846923910  | -1.4304707809 |
| H    | -2.1619288916 | 2.1597254346  | -1.3531921172 |
| H    | 2.1619288916  | 2.1597254346  | -1.3531921172 |
| H    | 0.0000000000  | -7.7541567843 | -7.8269720491 |
| H    | -2.1567200793 | 0.0477954876  | -0.0457375813 |
| H    | 2.1567200793  | 0.0477954876  | -0.0457375813 |
| H    | 0.0000000000  | -0.9760643215 | 0.5880671347  |
| H    | 0.0000000000  | 3.1982269410  | -1.9959660781 |

Table 5:  $[\text{C}_6\text{H}_6]^+ + \text{H}$  (unconstrained optimization using coordinates of Table 4 as initial

| geometry) |               |               |               |
|-----------|---------------|---------------|---------------|
| atom      | x             | y             | z             |
| C         | -1.2407619955 | 1.6889026901  | -1.0873135371 |
| C         | 1.2378659093  | 1.6637550904  | -1.0653269266 |
| C         | -1.2271566172 | 0.5140447015  | -0.3624959315 |
| C         | 1.2510122625  | 0.5022284272  | -0.3487342456 |
| C         | 0.0113355665  | -0.0822730718 | 0.0086124160  |
| C         | -0.0228974066 | 2.2712544412  | -1.4433935321 |
| H         | -2.1688381217 | 2.1463904993  | -1.3719662320 |
| H         | 2.1528696067  | 2.1432823938  | -1.3587637695 |
| H         | -0.0049140492 | -7.5574223599 | -7.6644977055 |
| H         | -2.1425940187 | 0.0335672253  | -0.0684753982 |
| H         | 2.1676880838  | 0.0287803279  | -0.0542656528 |
| H         | -0.0045418615 | -0.9980513928 | 0.5735221277  |
| H         | -0.0090673584 | 3.1856594500  | -2.0074625577 |

Table 6:  $[\text{C}_6\text{H}_5]^+ + \text{H}_2$

| atom | x             | y              | z             |
|------|---------------|----------------|---------------|
| C    | -1.2219189945 | 1.7342175324   | 0.0428557658  |
| C    | 1.2219189945  | 1.7342175324   | 0.0428557658  |
| C    | -1.2783445363 | 0.3095345544   | 0.0258818358  |
| C    | 1.2783445363  | 0.3095345544   | 0.0258818358  |
| C    | 0.0000000000  | -0.0606761497  | 0.0214727805  |
| C    | 0.0000000000  | 2.4139420237   | 0.0509542076  |
| H    | -2.1592317915 | 2.2592773863   | 0.0491109889  |
| H    | 2.1592317915  | 2.2592773863   | 0.0491109889  |
| H    | 0.0000000000  | -10.6841567843 | -0.2754062473 |
| H    | -2.1661953586 | -0.2901638524  | 0.0187359356  |
| H    | 2.1661953586  | -0.2901638524  | 0.0187359356  |
| H    | 0.0000000000  | -10.6671702003 | 0.4598359972  |
| H    | 0.0000000000  | 3.4868410319   | 0.0637369721  |

Table 7: MCSCF and MRMP2 molecular energies (in a.u.) and imaginary vibrational frequency magnitudes (in  $\text{cm}^{-1}$ ).

| Molecule                                                | MCSCF energy    | MCSCF Imaginary frequency | MRMP2 energy    |
|---------------------------------------------------------|-----------------|---------------------------|-----------------|
| $[\text{C}_6\text{H}_7]^+$                              | -231.1200862920 | —                         | -231.8689858764 |
| TS 1-2 mig                                              | -231.1013074788 | 568.54                    | -231.8538407563 |
| two-fold saddle                                         | -231.0125220925 | 2082.72, 2081.53          | -231.7891051390 |
| $C_s$ constrained $[\text{C}_6\text{H}_6]^+ + \text{H}$ | -231.0053514045 | 378.03 , 13.10            | -231.7409779789 |
| unconstrained $[\text{C}_6\text{H}_6]^+ + \text{H}$     | -231.0054146686 | —                         | -231.7406383582 |
| $[\text{C}_6\text{H}_5]^+ + \text{H}_2$                 | -231.0133268418 | —                         | -231.7536547583 |

## 2 Topological properties of the electron density

This section contains:

1. Atomic charge, energy and localization index defined as  $\lambda(A) = \delta(A,A)$ . For pairs of atoms: delocalization index  $\delta(A,B)$
2. Electron density and its Laplacian at bond critical points of  $\rho(r)$ .

Values for non equivalent atoms or pairs of atoms are reported. The atomic labels are the same as in Scheme 1 of the paper.

In addition:

3. Electron density profiles along the  $C_6$  axis of the molecular graphs of Figure 2(b) of the paper.



Table 8: Atomic properties for benzenium

| Atom | Charge | Energy  | Localization index |
|------|--------|---------|--------------------|
| C1   | 0.056  | -37.816 | 3.903              |
| C2   | 0.003  | -37.878 | 4.106              |
| C3   | 0.123  | -37.802 | 3.974              |
| C4   | -0.025 | -37.897 | 4.127              |
| Ha   | 0.113  | -0.562  | 0.364              |
| H2   | 0.099  | -0.584  | 0.373              |
| H3   | 0.089  | -0.587  | 0.379              |
| H4   | 0.113  | -0.580  | 0.365              |

Table 9: Delocalization index and properties at bcp for benzenium

| A-B   | $\rho_b$ | $\delta(A,B)$ | $\nabla^2\rho_b$ |
|-------|----------|---------------|------------------|
| C1-C2 | 0.282    | 1.052         | -0.836           |
| C2-C3 | 0.337    | 1.395         | -1.103           |
| C3-C4 | 0.315    | 1.242         | -1.007           |
| C1-Ha | 0.273    | 0.891         | -0.962           |
| C2-H2 | 0.300    | 0.954         | -1.155           |
| C3-H3 | 0.298    | 0.952         | -1.133           |
| C4-H4 | 0.303    | 0.949         | -1.185           |

Table 10: Atomic properties for 1-2 proton migration TS

| Atom | Charge | Energy  | Localization index |
|------|--------|---------|--------------------|
| C1   | -0.049 | -37.905 | 4.094              |
| C3   | 0.087  | -37.814 | 4.027              |
| C4   | 0.062  | -37.834 | 4.041              |
| H2   | 0.133  | -0.568  | 0.347              |
| H3   | 0.093  | -0.585  | 0.375              |
| H4   | 0.086  | -0.589  | 0.382              |
| Ha   | 0.174  | -0.508  | 0.290              |

Table 11: Delocalization index and properties at bcp for 1-2 proton migration TS

| A-B        | $\rho_b$ | $\delta(A,B)$ | $\nabla^2\rho_b$ |
|------------|----------|---------------|------------------|
| C1-C2      | 0.292    | 1.066         | -0.824 7         |
| C2-C3      | 0.302    | 1.167         | -0.942           |
| C3-C4      | 0.332    | 1.370         | -1.069           |
| C4-C5      | 0.306    | 1.197         | -0.946           |
| C1-Hb      | 0.300    | 0.934         | -1.160           |
| C3-H3      | 0.298    | 0.955         | -1.134           |
| C4-H4      | 0.299    | 0.957         | -1.143           |
| C1-Ha      | —        | 0.478         | —                |
| (C1-C2)-Ha | 0.189    | —             | -0.257           |

Table 12: Atomic properties for  $[\text{C}_6\text{H}_6]^+ + \text{H}$  (dissociation constrained to  $C_s$  symmetry)

| Atom | Charge | Energy  | Localization index |
|------|--------|---------|--------------------|
| C1   | -0.015 | -37.888 | 4.136              |
| C2   | 0.082  | -37.821 | 3.992              |
| C3   | 0.090  | -37.821 | 4.020              |
| C4   | 0.018  | -37.855 | 4.175              |
| Hb   | 0.134  | -0.570  | 0.349              |
| H2   | 0.106  | -0.580  | 0.367              |
| H3   | 0.099  | -0.583  | 3.725              |
| H4   | 0.110  | -0.580  | 0.364              |
| Ha   | 0.000  | -0.500  | 1.000              |

Table 13: Delocalization index and properties at bcp for  $[\text{C}_6\text{H}_6]^+ + \text{H}$  (dissociation constrained

| to $C_s$ symmetry) |          |               |                  |
|--------------------|----------|---------------|------------------|
| A-B                | $\rho_b$ | $\delta(A,B)$ | $\nabla^2\rho_b$ |
| C1-C2              | 0.309    | 1.270         | -0.985           |
| C2-C3              | 0.337    | 1.386         | -1.098           |
| C3-C4              | 0.306    | 1.202         | -0.953           |
| C1-Ha              | 0.304    | 0.943         | -1.195           |
| C2-H2              | 0.299    | 0.949         | -1.149           |
| C3-H3              | 0.299    | 0.953         | -1.145           |
| C4-H4              | 0.301    | 0.958         | -1.164           |
| C1-Hb              | 0.000    | 0.000         | 0.000            |

Table 14: Atomic properties for the asymmetric  $[\text{C}_6\text{H}_6]^+ + \text{H}$  (unconstrained optimization using

coordinates of Table 4 as initial geometry)

| Atom | Charge | Energy  | Localization index |
|------|--------|---------|--------------------|
| C1   | -0.005 | -37.879 | 4.125              |
| C2   | 0.118  | -37.801 | 3.976              |
| C3   | 0.056  | -37.841 | 4.073              |
| C4   | 0.020  | -37.857 | 4.159              |
| C5   | 0.122  | -37.800 | 3.974              |
| C6   | 0.037  | -37.851 | 4.034              |
| Hb   | 0.130  | -0.572  | 0.351              |
| H2   | 0.097  | -0.583  | 0.373              |
| H3   | 0.101  | -0.583  | 0.371              |
| H4   | 0.109  | -0.580  | 0.365              |
| H5   | 0.097  | -0.583  | 0.373              |
| H6   | 0.117  | -0.576  | 0.359              |
| Ha   | 0.000  | -0.500  | 1.000              |

Table 15: Delocalization index and properties at bcp for the asymmetric  $[\text{C}_6\text{H}_6]^+ \text{H}$   
(unconstrained optimization using coordinates of Table 4 as initial geometry)

| A-B   | $\rho_b$ | $\delta(\text{A,B})$ | $\nabla^2\rho_b$ |
|-------|----------|----------------------|------------------|
| C1-C2 | 0.310    | 1.243                | -0.990           |
| C2-C3 | 0.337    | 1.390                | -1.100           |
| C3-C4 | 0.294    | 1.145                | -0.897           |
| C4-C5 | 0.321    | 1.284                | -1.024           |
| C5-C6 | 0.330    | 1.350                | -1.075           |
| C6-C1 | 0.311    | 1.301                | -0.984           |
| C1-Hb | 0.303    | 0.945                | -1.189           |
| C2-H2 | 0.298    | 0.952                | -1.136           |
| C3-H3 | 0.300    | 0.955                | -1.151           |
| C4-H4 | 0.301    | 0.957                | -1.164           |
| C5-H5 | 0.298    | 0.951                | -1.139           |
| C6-H6 | 0.301    | 0.946                | -1.169           |
| C1-Ha | 0.000    | 0.000                | 0.000            |

Table 16: Atomic properties for  $[\text{C}_6\text{H}_5]^+ + \text{H}_2$

| Atom | Charge | Energy  | Localization index |
|------|--------|---------|--------------------|
| C1   | -0.563 | -38.396 | 4.979              |
| C2   | 0.282  | -37.674 | 3.933              |
| C3   | 0.081  | -37.780 | 4.050              |
| C4   | 0.112  | -37.789 | 4.001              |
| Ha   | 0.000  | -0.564  | 0.500              |
| H2   | 0.198  | -0.529  | 0.298              |
| H3   | 0.117  | -0.574  | 0.357              |
| H4   | 0.094  | -0.585  | 0.375              |

Table 17: Delocalization index and properties at bcp for  $[\text{C}_6\text{H}_5]^+ + \text{H}_2$

| A-B        | $\rho_b$ | $\delta(\text{A,B})$ | $\nabla^2\rho_b$ |
|------------|----------|----------------------|------------------|
| C1-C2      | 0.333    | 1.306                | -0.807           |
| C2-C3      | 0.287    | 1.160                | -0.821           |
| C3-C4      | 0.317    | 1.285                | -0.984           |
| C1-Ha      | —        | 0.000                | —                |
| C2-H2      | 0.293    | 0.902                | -1.125           |
| C3-H3      | 0.297    | 0.941                | -1.127           |
| C4-H4      | 0.298    | 0.953                | -1.134           |
| Ha-Hb      | 0.266    | 1.000                | -1.120           |
| (Ha-Hb)-C1 | 0.000    | —                    | 0.000            |

Table 18: Atomic properties for the two-fold saddle point

| Atom | Charge | Energy  | Localization index |
|------|--------|---------|--------------------|
| C    | -0.020 | -37.870 | 4.055              |
| H    | 0.109  | -0.578  | 0.364              |
| Ha   | 0.463  | -0.321  | 0.169              |

Table 19: Delocalization index and properties at bcp for the two-fold saddle point

| A-B  | $\rho_b$ | $\delta(A,B)$ | $\nabla^2\rho_b$ |
|------|----------|---------------|------------------|
| C-C  | 0.316    | 1.277         | -0.9813          |
| C-H  | 0.299    | 0.947         | -1.149           |
| C-Ha | 0.066    | 0.121         | 0.064            |

Table 20: Atomic properties for benzene

| Atom | Charge | Energy  | Localization index |
|------|--------|---------|--------------------|
| C    | 0.016  | -37.840 | 4.068              |
| H    | -0.016 | -0.631  | 0.462              |

Table 21: Delocalization index and properties at bcp for benzene

| A-B | $\rho_b$ | $\delta(A,B)$ | $\nabla^2\rho_b$ |
|-----|----------|---------------|------------------|
| C-C | 0.318    | 1.287         | -0.991           |
| C-H | 0.292    | 0.987         | -1.085           |



The electron density profiles along the  $C_6$  axis of each of the molecular graphs of Figure 2(b) of the manuscript are shown below. It can be seen that for the structurally stable molecule **1-2S** the electron density decreases monotonically from the H atom towards the aromatic ring and to infinity. It also shows how the bifurcation mechanism operates as the H atom is removed along the  $C_6$  axis: in (b) a degenerate critical point appears to suddenly bifurcate into a ring and a cage critical points in (c).

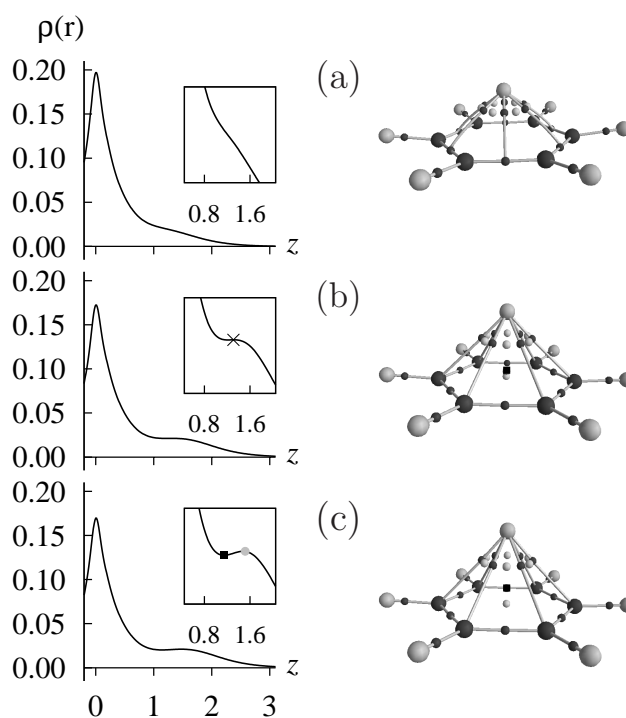

Figure 1: Electron density profiles along the  $C_6$  axis of selected molecular graphs showing the bifurcation mechanism of **1-2S**. In each case the origin is located at the position of the migrating H atom and the  $z$  axis is oriented towards the ring of C atoms. The stable critical points are denoted as in Figure 2 and  $\times$  refers to the approximate position of the unstable critical point in the inset of (b). Distances are in Å
